# Supplementary material
Source: PubMed Central journal article supplement (PMC5651183)
Supplement: NIHMS896457-supplement-2.pdf [file NIHMS896457-supplement-2.pdf]

Scenario 1: Patient with nephrology care

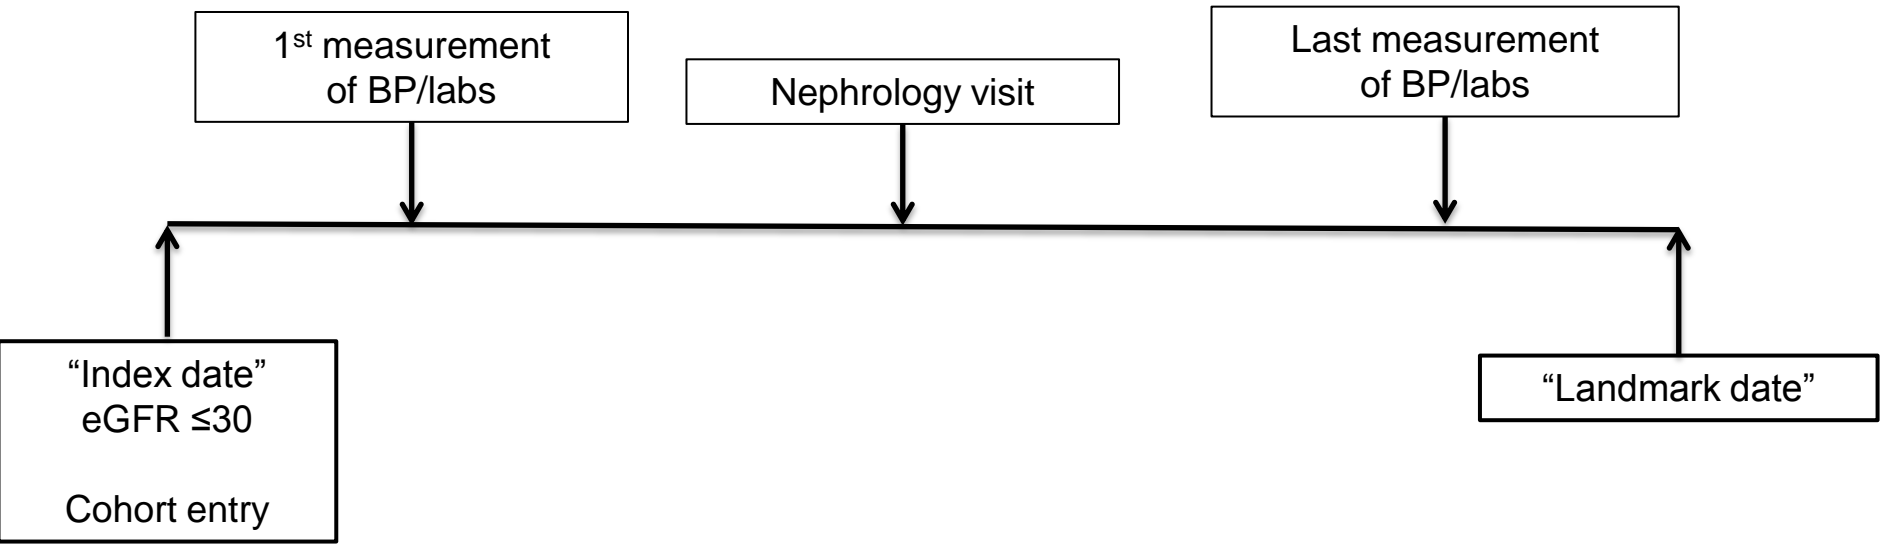

Scenario 2: Patient with no nephrology care

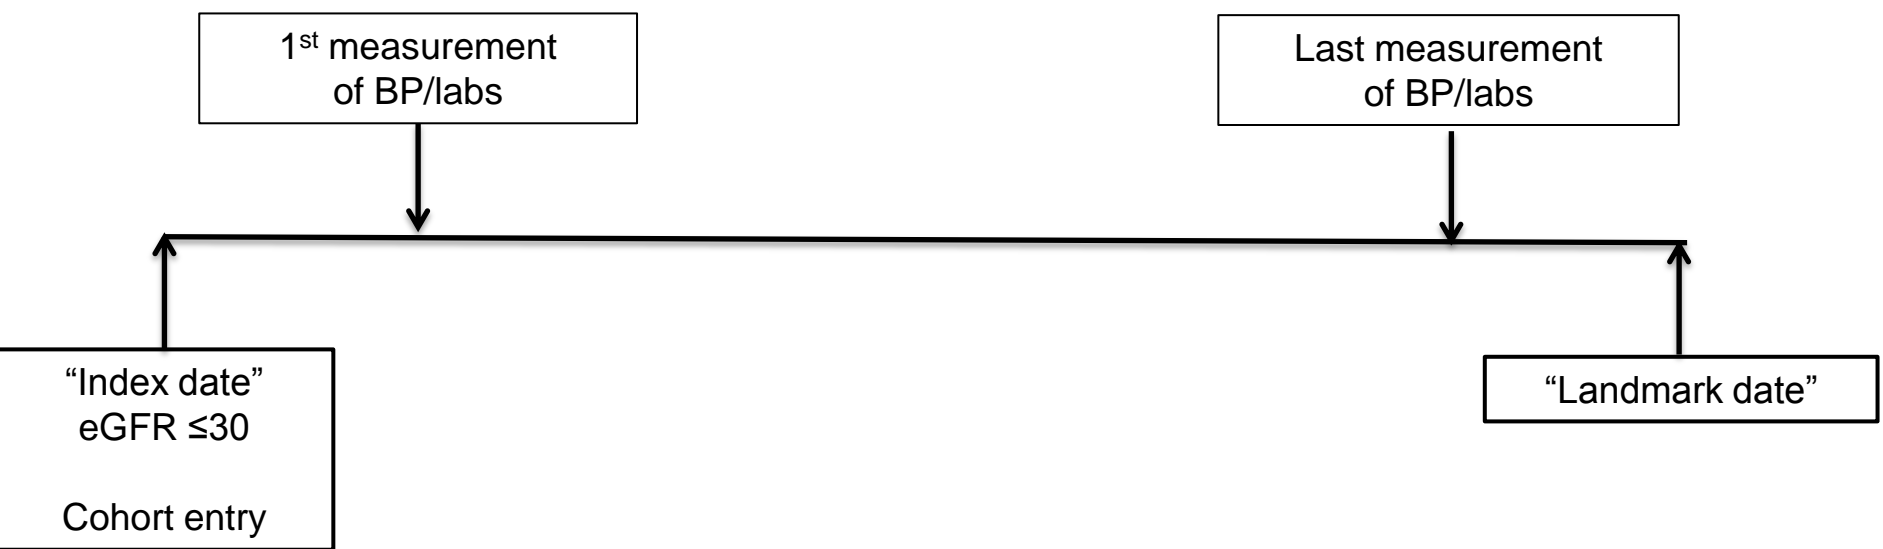

Figure S2. Schematic of assessment of clinical parameters.
