# Supplementary material
Source: PubMed Central journal article supplement (PMC5651183)
Supplement: NIHMS896457-supplement-3.pdf [file NIHMS896457-supplement-3.pdf]

**Table S1.** Values of clinical parameter measurements.

|                                            | Nephrology care <sup>1</sup> |                  | No nephrology care <sup>2</sup> |                  |
|--------------------------------------------|------------------------------|------------------|---------------------------------|------------------|
|                                            | First measurement            | Last measurement | First measurement               | Last measurement |
| <b>Hemoglobin, g/dL (SD)</b>               | 11.9 (2.2)                   | 12.1 (1.9)       | 12.0 (2.0)                      | 12.3 (1.9)       |
| <b>Potassium, meq/L (SD)</b>               | 4.5 (0.6)                    | 4.5 (0.5)        | 4.5 (0.7)                       | 4.4 (0.6)        |
| <b>Albumin, g/dL (SD)</b>                  | 3.8 (2.0)                    | 3.8 (1.3)        | 3.7 (0.9)                       | 3.8 (0.8)        |
| <b>Calcium, mg/dL (SD)</b>                 | 9.2 (0.6)                    | 9.2 (0.6)        | 9.1 (0.7)                       | 9.2 (0.6)        |
| <b>Phosphorus, mg/dL (SD)</b>              | 3.7 (0.8)                    | 3.7 (0.7)        | 3.6 (0.9)                       | 3.6 (0.7)        |
| <b>Systolic blood pressure, mmHg (SD)</b>  | 134.1 (20.2)                 | 134.8 (19.1)     | 131.3 (19.7)                    | 132.3 (19.1)     |
| <b>Diastolic blood pressure, mmHg (SD)</b> | 70.6 (12.4)                  | 71.0 (11.9)      | 68.9 (11.8)                     | 69.6 (11.6)      |

1. Number of patients with two measurements: Hemoglobin – 12091, potassium – 14099, albumin – 11653, calcium – 13274, phosphorus – 10145, blood pressure – 14848
2. Number of patients with two measurements: Hemoglobin – 17691, potassium – 20872, albumin – 17208, calcium – 19221, phosphorus – 9857, blood pressure – 24109
