# Supplementary material
Source: PubMed Central journal article supplement (PMC5651183)
Supplement: NIHMS896457-supplement-4.pdf [file NIHMS896457-supplement-4.pdf]

**Table S2.** Association between nephrology care and risk for end-stage renal disease among patients with advanced chronic kidney disease, accounting for competing risk of death, adjusting for absolute change in eGFR.

|                                     | <b>Multivariable adjusted sub-distribution<br/>HR (95% CI)</b> |
|-------------------------------------|----------------------------------------------------------------|
| <b>Any nephrology care</b>          | 1.41 (1.32-1.51)                                               |
| <b>Frequency of nephrology care</b> |                                                                |
| <b>0</b>                            | 1.00 (Reference)                                               |
| <b>1-2</b>                          | 1.19 (1.09-1.29)                                               |
| <b>3-4</b>                          | 1.52 (1.38-1.67)                                               |
| <b>≥5</b>                           | 1.75 (1.59-1.94)                                               |

Adjusted for age, sex, race, marital status, place of residence, copay status, zipcode median income, facility complexity, prior hospitalization, visits to non-nephrology VA provider, diabetes, myocardial infarction, congestive heart failure, peripheral vascular disease, dementia, cerebrovascular disease, chronic liver disease, cancer, depression post-traumatic stress disorder (PTSD), and absolute change in kidney function

N = 39,669
