# Supplementary material
Source: PubMed Central journal article supplement (PMC5651183)
Supplement: NIHMS896457-supplement-5.pdf [file NIHMS896457-supplement-5.pdf]

**Table S3.** Characteristics of propensity score matched cohort.

|                                   | All<br>N=39,669 | Before propensity score matching |                                   | After propensity score matching |                                   | Standardized<br>difference<br>(%) |
|-----------------------------------|-----------------|----------------------------------|-----------------------------------|---------------------------------|-----------------------------------|-----------------------------------|
|                                   |                 | Nephrology<br>care N=14,983      | No nephrology<br>care<br>N=24,686 | Nephrology care<br>N=11,892     | No nephrology<br>care<br>N=11,892 |                                   |
| Age*                              | 75.9 ± 11.0     | 72.5 ± 10.7                      | 77.9 ± 10.6                       | 74.4 ± 10.2                     | 74.3 ± 10.7                       | 0.5                               |
| Age group, n (%)                  |                 |                                  |                                   |                                 |                                   |                                   |
| 21-64                             | 8,172 (20.6%)   | 4,308 (28.8)                     | 3,864 (15.7%)                     | 2,617 (22.0%)                   | 2,875 (24.2%)                     | 6.2                               |
| 65-74                             | 8,910 (22.5%)   | 4,096 (27.3%)                    | 4,814 (19.5%)                     | 3,223 (27.1%)                   | 2,968 (25.0%)                     |                                   |
| ≥75                               | 22,587 (56.9%)  | 6,579 (43.9)                     | 16,008 (64.9%)                    | 6,052 (50.9%)                   | 6,049 (50.9%)                     |                                   |
| Sex, n (%)                        |                 |                                  |                                   |                                 |                                   |                                   |
| Female                            | 1,166 (2.9%)    | 387 (2.6%)                       | 779 (3.2%)                        | 292 (2.5%)                      | 291 (2.4%)                        | 0.1                               |
| Male                              | 38,503 (97.1%)  | 14,596 (97.4%)                   | 23,907 (96.8%)                    | 11,600 (97.5%)                  | 11,601 (97.6%)                    |                                   |
| Race , n (%)                      |                 |                                  |                                   |                                 |                                   |                                   |
| White                             | 29,180 (73.6%)  | 10,110 (67.5%)                   | 19,070 (77.3%)                    | 8,715 (73.3%)                   | 8,735 (73.5%)                     | 1.1                               |
| Black                             | 6,453 (16.3%)   | 3,382 (22.6%)                    | 3,071 (12.4%)                     | 2,168 (18.2%)                   | 2,126 (17.9%)                     |                                   |
| Other                             | 3,165 (8.0%)    | 1,239 (8.3%)                     | 1,926 (7.8%)                      | 1,009 (8.5%)                    | 1,031 (8.7%)                      |                                   |
| Missing                           | 871 (2.2%)      | 252 (1.7%)                       | 619 (2.5%)                        | 0 (0.0%)                        | 0 (0.0%)                          |                                   |
| Marital status, n (%)             |                 |                                  |                                   |                                 |                                   |                                   |
| Married                           | 21,379 (53.9%)  | 8,050 (53.7%)                    | 13,329 (54.0%)                    | 6,452 (54.3%)                   | 6,420 (54.0%)                     | 0.5                               |
| Other                             | 18,290 (46.1%)  | 6,933 (46.3%)                    | 11,357 46.0%)                     | 5,440 (45.7%)                   | 5,472 (46.0%)                     |                                   |
| Residence, n (%)                  |                 |                                  |                                   |                                 |                                   |                                   |
| Suburban,<br>rural, small<br>town | 5,552 (14.0%)   | 1,897 (12.7%)                    | 3,655 (14.8%)                     | 1,641 (13.8%)                   | 1,647 (13.8%)                     | 0.2                               |
| Urban                             | 33,197 (83.7%)  | 12,741 (85.0%)                   | 20,456 (82.9%)                    | 10,251 (86.2%)                  | 10,245 (86.2%)                    |                                   |
| Missing                           | 920 (2.3%)      | 345 (2.3%)                       | 575 (2.3%)                        | 0 (0.0%)                        | 0 (0.0%)                          |                                   |

|                               |                |                |                |               |               |     |
|-------------------------------|----------------|----------------|----------------|---------------|---------------|-----|
| Copay status, n (%)           |                |                |                |               |               | 0.0 |
| No copay                      | 29,820 (75.2%) | 10,663 (71.2%) | 19,157 (77.6%) | 8,787 (73.9%) | 8,788 (73.9%) |     |
| Copay                         | 9,789 (24.7%)  | 4,295 (28.7%)  | 5,494 (22.3%)  | 3,105 (26.1%) | 3,104 (26.1%) |     |
| Missing                       | 60 (0.2%)      | 25 (0.1%)      | 35 (0.1%)      | 0 (0.0%)      | 0 (0.0%)      |     |
| Zip code median income, n (%) |                |                |                |               |               |     |
| <35K                          | 6,794 (17.1%)  | 2,706 (18.1%)  | 4,088 (16.6%)  | 2,084 (17.5%) | 2,078 (17.5%) | 0.7 |
| 35-<50K                       | 16,005 (40.3%) | 5,925 (39.5%)  | 10,080 (40.8%) | 4,882 (41.1%) | 4,920 (41.4%) |     |
| 50-<65K                       | 9,484 (23.9%)  | 3,601 (24.0%)  | 5,883 (23.8%)  | 2,945 (24.8%) | 2,926 (24.6%) |     |
| ≥65K                          | 6,692 (16.9%)  | 2,483 (16.6%)  | 4,209 (17.1%)  | 1,981 (16.7%) | 1,968 (16.5%) |     |
| Missing                       | 694 (1.7%)     | 268 (1.8%)     | 426 (1.7%)     | 0 (0.0%)      | 0 (0.0%)      |     |
| Facility complexity, n (%)    |                |                |                |               |               |     |
| Low                           | 3,503 (8.8%)   | 983 (6.6%)     | 2,520 (10.2%)  | 884 (7.4%)    | 877 (7.4%)    | 0.9 |
| Mid                           | 6,246 (15.7%)  | 2,433 (16.2%)  | 3,813 (15.4%)  | 1,903 (16.0%) | 1,941 (16.3%) |     |
| High                          | 29,541 (74.5%) | 11,454 (76.4%) | 18,087 (73.3%) | 9,105 (76.6%) | 9,074 (76.3%) |     |
| Missing                       | 379 (1.0%)     | 113 (0.7%)     | 266 (1.1%)     | 0 (0.0%)      | 0 (0.0%)      |     |
| Comorbidities, n (%)          |                |                |                |               |               |     |
| Diabetes                      | 22,299 (56.2%) | 9,165 (61.2%)  | 13,134 (53.2%) | 7,059 (59.4%) | 7,084 (59.6%) | 0.4 |
| Myocardial infarction         | 2,676 (6.7%)   | 960 (6.4%)     | 1,716 (7.0%)   | 782 (6.6%)    | 777 (6.5%)    | 0.2 |
| Congestive heart failure      | 11,741 (29.6%) | 4,360 (29.1%)  | 7,381 (29.9%)  | 3,531 (29.7%) | 3,510 (29.5%) | 0.4 |
| Peripheral vascular disease   | 7,741 (19.5%)  | 3,006 (20.1%)  | 4,735 (19.2%)  | 2,436 (20.5%) | 2,412 (20.3%) | 0.5 |
| Dementia                      | 2,709 (6.8%)   | 675 (4.5%)     | 2,034 (8.2%)   | 619 (5.2%)    | 582 (4.9%)    | 1.4 |

|                                                       |                |               |                |               |               |     |
|-------------------------------------------------------|----------------|---------------|----------------|---------------|---------------|-----|
| Cerebrovascular disease                               | 6,151 (15.5%)  | 2,255 (15.0%) | 3,896 (15.8%)  | 1,827 (15.4%) | 1,833 (15.4%) | 0.1 |
| Chronic liver disease                                 | 1,266 (3.2%)   | 607 (4.1%)    | 659 (2.7%)     | 418 (3.5%)    | 414 (3.5%)    | 0.2 |
| Cancer                                                | 8,018 (20.2%)  | 2,919 (19.5%) | 5,099 (20.6%)  | 2,421 (20.4%) | 2,437 (20.5%) | 0.3 |
| Depression                                            | 8,204 (20.7%)  | 3,299 (22.0%) | 4,905 (19.9%)  | 2,516 (21.2%) | 2,504 (21.1%) | 0.3 |
| PTSD                                                  | 3,104 (7.8%)   | 1,344 (9.0%)  | 1,760 (7.1%)   | 1,005 (8.5%)  | 978 (8.2%)    | 0.8 |
| Prior hospitalization, n (%)                          | 10,515 (26.5%) | 4,306 (28.7%) | 6,209 (25.2%)  | 3,314 (27.9%) | 3,307 (27.8%) | 0.1 |
| Visits to non-nephrology provider, n (%)              |                |               |                |               |               |     |
| 0                                                     | 3,940 (9.9%)   | 1,144 (7.6%)  | 2,796 (11.3%)  | 970 (8.2%)    | 974 (8.2%)    | 1.1 |
| 1-2                                                   | 8,763 (22.1%)  | 2,731 (18.2%) | 6,032 (24.4%)  | 2,337 (19.7%) | 2,325 (19.6%) |     |
| 3-4                                                   | 8,774 (22.1%)  | 3,014 (20.1%) | 5,760 (23.3%)  | 2,495 (21.0%) | 2,544 (21.4%) |     |
| ≥5                                                    | 18,192 (45.9%) | 8,094 (54.0%) | 10,098 (40.9%) | 6,090 (51.2%) | 6,049 (50.9%) |     |
| Index eGFR (ml/min/ 1.73m <sup>2</sup> )*             | 25.1 ± 4.5     | 24.8 ± 4.5    | 25.2 ± 4.5     | 24.9 ± 4.5    | 24.9 ± 4.9    | 1.0 |
| eGFR trajectory (ml/min/ 1.73m <sup>2</sup> per year) |                |               |                |               |               |     |
| Improvement                                           | 11,970 (30.2%) | 5,818 (38.8%) | 6,152 (24.9%)  | 4,131 (34.7%) | 4,095 (34.4%) | 1.5 |
| Decline <10                                           | 12,136 (30.6%) | 5,129 (34.2%) | 7,007 (28.4%)  | 4,036 (33.9%) | 4,009 (33.7%) |     |
| Decline ≥10                                           | 13,609 (34.3%) | 3,816 (25.5%) | 9,793 (39.7%)  | 3,521 (29.6%) | 3,594 (30.2%) |     |
| Missing or time lapse <30 days                        | 1,954 (4.9%)   | 220 (1.5%)    | 1,734 (7.0%)   | 204 (1.7%)    | 194 (1.6%)    |     |

\*expressed as mean ± standard deviation
