# Supplementary material
Source: PubMed Central journal article supplement (PMC5651183)

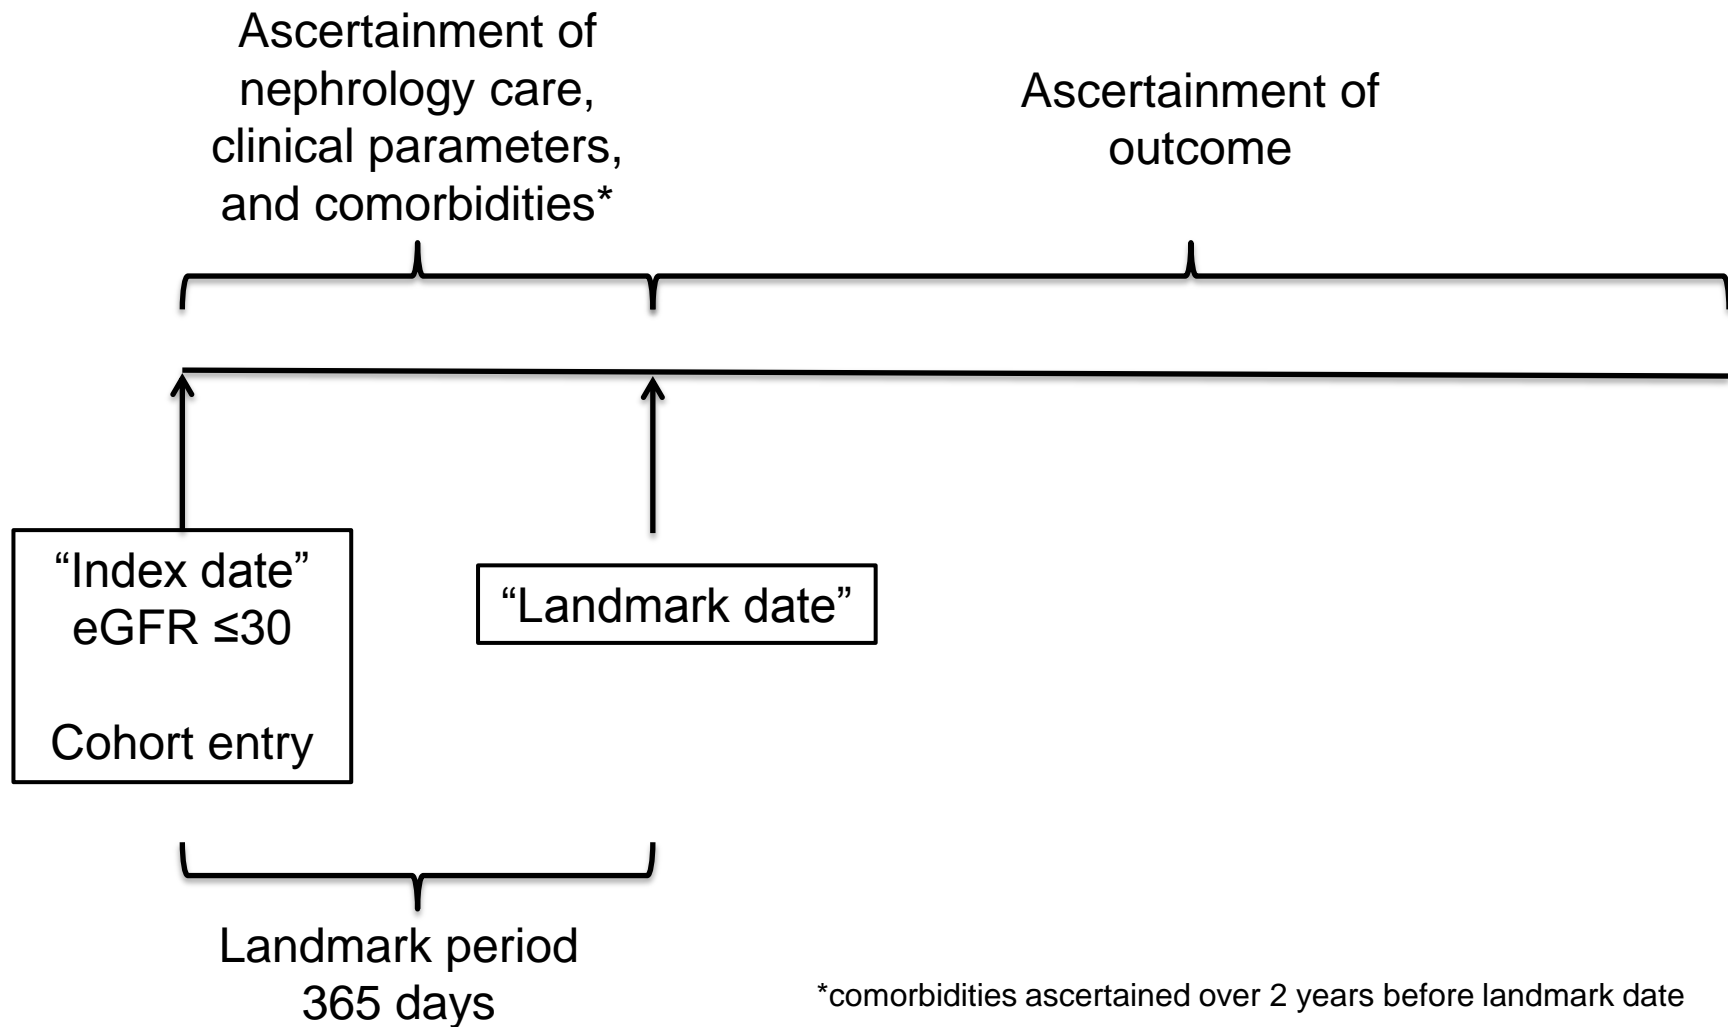

**Figure S1.** Schematic of landmark analysis.

Supplement: NIHMS896457-supplement-1.pdf [file NIHMS896457-supplement-1.pdf]
